1 **January 27, 2022**

2 **Molecular hydrogen is an overlooked energy source for**  
3 **marine bacteria**

4 Rachael Lappan<sup>1</sup> #, Guy Shelley<sup>2</sup> #, Zahra F. Islam<sup>1</sup> #, Pok Man Leung<sup>1</sup>, Scott  
5 Lockwood<sup>3</sup>, Philipp A. Nauer<sup>4</sup>, Thanavit Jirapanjawat<sup>1</sup>, Ya-Jou Chen<sup>1,2</sup>, Adam J.  
6 Kessler<sup>4</sup>, Timothy J. Williams<sup>5</sup>, Ricardo Cavicchioli<sup>5</sup>, Federico Baltar<sup>6</sup>, Perran L.M.  
7 Cook<sup>4</sup>, Sergio E. Morales<sup>3</sup>, Chris Greening<sup>1,2</sup> \*

8

9 <sup>1</sup> Department of Microbiology, Biomedicine Discovery Institute, Monash University,  
10 Clayton, VIC 3800, Australia

11 <sup>2</sup> School of Biological Sciences, Monash University, Clayton, VIC 3800, Australia

12 <sup>3</sup> Department of Microbiology and Immunology, University of Otago, Dunedin 9016,  
13 New Zealand

14 <sup>4</sup> School of Chemistry, Monash University, Clayton, VIC 3800, Australia

15 <sup>5</sup> School of Biotechnology and Biomolecular Sciences, UNSW Sydney, Kensington,  
16 NSW 2052, Australia

17 <sup>6</sup> Microbial Oceanography Unit, Department of Functional and Evolutionary Ecology,  
18 University of Vienna, Vienna A-1030, Austria

19

20 # These authors contributed equally to this work.

21

22 \* Correspondence can be addressed to:

23 Chris Greening (chris.greening@monash.edu), Department of Microbiology,  
24 Biomedicine Discovery Institute, Monash University, Clayton, VIC 3800, Australia

25

## 26 **Abstract**

27 Molecular hydrogen (H<sub>2</sub>) and carbon monoxide (CO) are supersaturated in seawater  
28 relative to the atmosphere and hence are readily accessible energy sources for marine  
29 microbial communities. Yet while marine CO oxidation is well-described, it is unknown  
30 whether seawater communities consume H<sub>2</sub>. Here we integrated genome-resolved  
31 metagenomics, biogeochemistry, thermodynamic modelling, and culture-based  
32 analysis to profile H<sub>2</sub> and CO oxidation by marine bacteria. Based on analysis of 14  
33 surface water samples, collected from three locations spanning tropical to subantarctic  
34 fronts, three uptake hydrogenase classes are prevalent in seawater and encoded by  
35 major marine families such as Rhodobacteraceae, Flavobacteriaceae, and  
36 Sphingomonadaceae. However, they are less abundant and widespread than carbon  
37 monoxide dehydrogenases. Consistently, microbial communities in surface waters  
38 slowly consumed H<sub>2</sub> and rapidly consumed CO at environmentally relevant  
39 concentrations, with H<sub>2</sub> oxidation most active in subantarctic waters. The cell-specific  
40 power from these processes exceed bacterial maintenance requirements and, for H<sub>2</sub>,  
41 can likely sustain growth of bacteria with low energy requirements. Concordantly, we  
42 show that the polar ultramicrobacterium *Sphingopyxis alaskensis* grows  
43 mixotrophically on H<sub>2</sub> by expressing a group 2a [NiFe]-hydrogenase, providing the first  
44 demonstration of atmospheric H<sub>2</sub> oxidation by a marine bacterium. Based on TARA  
45 Oceans metagenomes, genes for trace gas oxidation are globally distributed and are  
46 fourfold more abundant in deep compared to surface waters, highlighting that trace  
47 gases are important energy sources especially in energy-limited waters. Altogether,  
48 these findings show H<sub>2</sub> is a significant energy source for marine communities and  
49 suggest that trace gases influence the ecology and biogeochemistry of oceans  
50 globally.

## 51 Introduction

52 Over the last decade, it has emerged that trace gases are major energy sources  
53 supporting the growth and survival of aerobic bacteria <sup>1</sup>. Two trace gases, molecular  
54 hydrogen (H<sub>2</sub>) and carbon monoxide (CO), are particularly dependable substrates  
55 given their ubiquity, diffusibility, and energy yields <sup>2,3</sup>. Bacteria oxidise these gases,  
56 including below atmospheric concentrations, using group 1 and 2 [NiFe]-  
57 hydrogenases and form I carbon monoxide dehydrogenases linked to aerobic  
58 respiratory chains <sup>4-9</sup>. Trace gas oxidation enables diverse organoheterotrophic  
59 bacteria to survive long-term starvation for their preferred organic growth substrates  
60 <sup>10,11</sup>. In addition, this process can support mixotrophic growth on various organic and  
61 inorganic energy sources <sup>10,12,13</sup>. To date, bacteria from eight different phyla have been  
62 experimentally shown to consume H<sub>2</sub> and CO at ambient levels <sup>7,12-19</sup>, with numerous  
63 other bacteria encoding the determinants of this process <sup>9,20</sup>. At the ecosystem scale,  
64 most bacteria in soil ecosystems harbour genes for trace gas oxidation and cell-  
65 specific rates of trace gas oxidation are theoretically sufficient to sustain their survival  
66 <sup>21,22</sup>. However, given most of these studies have focused on soil environments or  
67 isolates, the wider significance of trace gas oxidation remains largely unexplored.

68

69 Trace gases are particularly relevant energy sources for oceanic bacteria given they  
70 are generally available at elevated concentrations related to the atmosphere, in  
71 contrast to most soils. Surface layers of the world's oceans are generally  
72 supersaturated with H<sub>2</sub> and CO, typically by 2- to 5-fold (up to 15-fold) and 20- to 200-  
73 fold (up to 2000-fold) relative to the atmosphere respectively <sup>23-26</sup>. As a result, oceans  
74 contribute to net atmospheric emissions of these gases <sup>27,28</sup>. CO is mainly produced  
75 through photochemical oxidation of dissolved organic matter <sup>29</sup>, whereas H<sub>2</sub> is

76 primarily produced by cyanobacterial nitrogen fixation<sup>30</sup>. High concentrations of H<sub>2</sub>  
77 are also produced during fermentation in hypoxic sediments which can diffuse into the  
78 overlying water column, especially in coastal waters<sup>31</sup>. For unresolved reasons, the  
79 distributions of these gases vary with latitude and exhibit opposite trends: while  
80 dissolved CO is highly supersaturated in polar waters, H<sub>2</sub> is often undersaturated<sup>32–</sup>  
81 <sup>37</sup>. These variations likely reflect differences in the relative rates of trace gas production  
82 and consumption in different climates.

83  
84 Oceanic microbial communities have long been known to consume CO, though their  
85 capacity to use H<sub>2</sub> has not been systematically evaluated<sup>38</sup>. Approximately a quarter  
86 of bacterial cells in oceanic surface waters encode CO dehydrogenases in surface  
87 waters and these span a wide range of taxa, including the globally abundant family  
88 Rhodobacteraceae (marine *Roseobacter* clade)<sup>9,39–42</sup>. Building on observations made  
89 for soil oxidation, CO oxidation potentially enhances the long-term survival of marine  
90 bacteria during periods of organic carbon starvation<sup>9</sup>; consistently, culture-based  
91 studies indicate CO does not influence growth of marine isolates, but the enzymes  
92 responsible are strongly upregulated during starvation<sup>43–46</sup>. While aerobic and  
93 anaerobic H<sub>2</sub> oxidation has been extensively described by benthic and hydrothermal  
94 vent communities<sup>47–49</sup>, to date no studies have shown whether pelagic bacterial  
95 communities can use this gas. Several surveys have detected potential H<sub>2</sub>-oxidising  
96 hydrogenases in seawater samples and isolates<sup>9,20,49,50</sup>. While Cyanobacteria are  
97 well-reported to oxidise H<sub>2</sub>, including marine isolates such as *Trichodesmium*, this  
98 process is thought to be limited to the endogenous recycling of H<sub>2</sub> produced by the  
99 nitrogenase reaction<sup>51,52</sup>.

100

101 In this study, we addressed these knowledge gaps by investigating the mediators,  
102 rates, and potential roles of H<sub>2</sub> and CO oxidation by marine bacteria. To do so, we  
103 performed side-by-side metagenomic and biogeochemical profiling of 14 samples  
104 collected from a temperate oceanic transect, a temperate coastal transect, and a  
105 tropical island, and also tested the capacity of three axenic marine bacterial isolates  
106 to aerobically consume atmospheric H<sub>2</sub>. We provide definitive ecosystem-scale and  
107 culture-based evidence that H<sub>2</sub> is a relevant energy source for marine bacteria, though  
108 is only used by a small proportion of community members in contrast to CO.

109

110

## 111 **Results and Discussion**

### 112 **Marine microbial communities slowly consume H<sub>2</sub> and rapidly consume CO**

113 We measured *in situ* concentrations and *ex situ* oxidation rates of H<sub>2</sub> and CO in 14  
114 surface seawater samples using an ultra-sensitive gas chromatograph. The samples  
115 were collected from three locations (**Fig. S1**): an oceanic transect spanning neritic,  
116 subtropical, and subantarctic front waters (Munida Transect off New Zealand coast; n  
117 = 8; **Fig. S2**); a temperate urban bay (Port Phillip Bay, Australia; n = 4); and a tropical  
118 coral island (Heron Island, Australia; n = 2). In line with global trends, both gases were  
119 supersaturated relative to the atmosphere in all samples. H<sub>2</sub> was supersaturated by  
120 5.4-, 4.8- and 12.4-fold respectively in the oceanic transect ( $2.0 \pm 1.2$  nM), the  
121 temperate bay ( $1.8 \pm 0.26$  nM), and, as previously reported<sup>53</sup>, the tropical island ( $4.6$   
122  $\pm 0.3$  nM). CO was moderately supersaturated in the oceanic transect (5.2-fold;  $0.36$   
123  $\text{nM} \pm 0.07$  nM), but highly oversaturated in both the temperate bay (123-fold;  $8.5 \pm 1.7$   
124 nM) and tropical island (118-fold;  $8.2 \pm 0.93$  nM).

125

126 Microbial oxidation of trace gases was detected in all but one of the collected samples  
127 during *ex situ* incubations (**Fig. 1**). For the temperate bay, H<sub>2</sub> and CO were consumed  
128 in water samples collected from the coast, intermediary zone, and bay centre (**Fig.**  
129 **1a**). Based on *in situ* gas concentrations, bulk oxidation rates of CO were 18-fold faster  
130 than H<sub>2</sub> ( $p < 0.0001$ ) (**Table S1**). Bulk oxidation rates did not significantly differ  
131 between the surface microlayer (i.e. the 1 mm interface between the atmosphere and  
132 ocean) and underlying waters. H<sub>2</sub> and CO oxidation was also evident in surface  
133 microlayer and underlying seawater samples collected from the tropical island (**Fig.**  
134 **S3**). We similarly observed rapid CO and slower H<sub>2</sub> consumption across the multi-front  
135 oceanic transect, though unexpectedly these activities were mutually exclusive. Net  
136 CO oxidation occurred throughout the coastal and subtropical waters, but was  
137 negligible in subantarctic waters. Conversely, net H<sub>2</sub> oxidation only occurred in the  
138 subantarctic waters (**Fig. 1b**). These divergent oxidation rates may help to explain the  
139 contrasting concentrations of H<sub>2</sub> and CO in global seawater <sup>32–37</sup>, though wider  
140 sampling and *in situ* assays would be required to confirm this. It should be noted that  
141 these measurements likely underestimate rates and overestimate thresholds of H<sub>2</sub>  
142 oxidation given there will still be underlying endogenous production of H<sub>2</sub> through  
143 nitrogen fixation during the incubations. Nevertheless, they provide the first definitive  
144 report of H<sub>2</sub> oxidation in marine water columns.

145

#### 146 **Marine microbial communities encode enzymes for both CO and H<sub>2</sub> oxidation**

147 To better understand the basis of these activities, we sequenced metagenomes of the  
148 14 samples (**Table S2 & S3**), which were assembled and binned into 110 medium-  
149 and high-quality metagenome-assembled genomes (MAGs) (**Table S4**). We used  
150 homology-based searches to determine the abundance of 50 metabolic marker genes

151 in the metagenomic reads (**Table S3**), assemblies (**Table S5**), and MAGs (**Table S4**).  
152 In common with other surface seawater communities <sup>54</sup>, analysis of community  
153 composition (**Fig. S4; Fig. 2b**) and metabolic genes (**Fig. 2a & 2b**) suggests most  
154 bacteria present are capable of organoheterotrophy, phototrophy, and aerobic  
155 respiration. The capacity for aerobic CO oxidation was moderately abundant.  
156 Approximately 12% of bacterial and archaeal cells encoded the *coxL* gene (encoding  
157 the catalytic subunit of the form I CO dehydrogenase), though relative abundance  
158 decreased from an average of 25% in the temperate bay where CO oxidation was  
159 highly active to 5.1% in subantarctic waters where CO oxidation was negligible (**Fig.**  
160 **2a; Fig. 1**). In contrast, H<sub>2</sub> oxidation was a rare trait: the catalytic subunit of aerobic  
161 H<sub>2</sub>-uptake [NiFe]-hydrogenases was encoded by an average of 1.1% of bacteria  
162 across the samples (**Fig. 2a; Table S3**). Hydrogenase abundance peaked in the  
163 tropical island samples (average 3.5%), but declined to 0.11% in the neritic and  
164 subtropical samples from the oceanic transect (**Fig. 2a**), in line with the contrasting H<sub>2</sub>  
165 oxidation rates between these samples (**Fig. 1; Fig. S3**). Abundance of H<sub>2</sub>- and CO-  
166 oxidising bacteria strongly predicted oxidation rates of each gas ( $R^2$  of 0.55 and 0.88  
167 respectively) (**Fig. S5**), though it is likely that repression of gene expression  
168 contributes to the negligible activities of some samples.

169  
170 Based on the metagenome data, the ability to oxidise CO was consistently a more  
171 common and widespread metabolic strategy than the oxidation of H<sub>2</sub>. Diverse form I  
172 CO dehydrogenase genes, mostly affiliating with the recently defined proteobacterial,  
173 actinobacterial, and mixed 1 clades of the enzyme <sup>9</sup>, were detected in the  
174 metagenomic short reads and assemblies (**Table S3 & S5**). This diversity was  
175 reflected in the assembled metagenomes, with the gene encoded by 13 MAGs (12%)

176 from the families Rhodobacteraceae, Flavobacteriales UA16, Litoricolaceae,  
177 Puniceispirillaceae, and Nanopelagicales S36-B12 (**Fig. 2b; Table S4**). All but two of  
178 these MAGs also encoded the genes for energy-converting rhodopsins or  
179 photosystem II, indicating they can harvest energy concurrently or alternately from  
180 both CO and light, in support of previous culture-based findings <sup>46</sup>. While most of these  
181 MAGs are predicted to be obligate heterotrophs, two Rhodobacteraceae MAGs also  
182 encoded type IA ribulose 1,5-bisphosphate carboxylase/oxygenase (RuBisCO) and  
183 hence are theoretically capable of carboxydrotrophic growth (**Fig. 2b; Table S4**). These  
184 findings support previous inferences that habitat generalists in marine waters depend  
185 on metabolic flexibility and use dissolved CO to enhance growth or survival <sup>40,55</sup>.

186

187 Based on the metagenomic reads and assemblies, three H<sub>2</sub>-uptake hydrogenases  
188 likely account for the observed oxidation activities (**Fig. 2a**). The group 1l [NiFe]-  
189 hydrogenase, recently discovered in Antarctic saline soils <sup>7</sup>, was encoded in most  
190 samples and was the sole uptake hydrogenase in the subantarctic samples (**Fig. 2a**);  
191 reads and assemblies for this enzyme closely affiliated with the hydrogenases of the  
192 reference genomes from the Rhodobacteraceae isolates *Pseudaestuariaivita atlantica*  
193 and *Marinovum algicola* (**Table S3 & S5**). The group 2a [NiFe]-hydrogenase, which  
194 supports mixotrophic growth in diverse bacteria <sup>12</sup>, was relatively abundant in the  
195 temperate bay and tropical island samples (**Fig. 2a**). We recovered one MAG  
196 encoding this enzyme, from the genus UBA3478 within the Flavobacteriaceae (**Fig.**  
197 **2b; Table S4**), as well as unbinned contigs closely related to the hydrogenase of this  
198 MAG and *Sphingopyxis alaskensis* (**Table S5**). The group 1d [NiFe]-hydrogenase,  
199 associated with aerobic hydrogenotrophic growth in diverse species <sup>20,47</sup>, was also  
200 abundant in the surface microlayer samples (**Fig. 2a**). Altogether, this assortment of



201 hydrogenases suggests a small proportion of marine bacteria (1.1%) from at least  
202 three dominant marine families (Flavobacteriaceae, Rhodobacteraceae,  
203 Sphingomonadaceae) have established a stable niche by using an abundant substrate  
204 to support growth and potentially persistence. The sole hydrogenase-encoding MAG  
205 also encoded genes for succinate oxidation and rhodopsin-dependent light harvesting,  
206 suggesting H<sub>2</sub> oxidation either supports mixotrophic growth or is a facultative trait.

207

208

### 209 **H<sub>2</sub> can theoretically support survival and likely growth of marine bacteria**

210 We used thermodynamic modelling to determine the amount of power (i.e. W per cell)  
211 generated based on the observed rates of trace gas oxidation (**Fig. 1; Table S1**) and  
212 predicted number of trace gas oxidisers (**Fig. 2a; Table S1**) in the sampled waters.  
213 This analysis was limited to the samples where oxidation was observed and reliable  
214 cell counts are available. On average, oxidation of the measured *in situ* concentrations  
215 of CO and H<sub>2</sub> yields  $7.2 \times 10^{-16}$  W and  $5.8 \times 10^{-14}$  W per cell (**Fig. 3**). The power derived  
216 from both trace gases is well within the range to sustain maintenance functions of  
217 bacteria, based on measurements of mostly copiotrophic isolates<sup>56,57</sup>. Marine H<sub>2</sub>  
218 oxidisers gain a particularly high amount of power by oxidising a relatively exclusive  
219 substrate at rapid cell-specific rates.

220

221 It is theoretically possible that the power derived from H<sub>2</sub> oxidation supports growth.  
222 The cell-specific power generated for the sample with the most active H<sub>2</sub> oxidisers ( $5.4$   
223  $\times 10^{-13}$  W; from the first subantarctic station) is below the growth requirements of most  
224 copiotrophic isolates, but likely sufficient to enable growth of the exceptionally small  
225 bacteria (ultramicrobacteria) that thrive in oligotrophic oceanic waters<sup>58</sup>. Moreover,

226 these power per cell calculations are likely underestimates given they do not account  
227 for any internal cycling of trace gases and assume all cells are equally active, and  
228 substantially increase when H<sub>2</sub> and CO become transiently highly elevated over space  
229 and time as depicted in **Fig. 3**. Altogether, these considerations make it even more  
230 plausible that a small proportion of bacteria in oceans can grow using H<sub>2</sub>. By  
231 predominantly relying on energy derived from H<sub>2</sub> oxidation, marine bacteria could  
232 potentially allocate most organic carbon for biosynthesis rather than respiration, i.e.  
233 adopting a predominantly lithoheterotrophic lifestyle.

234

### 235 **A marine isolate uses atmospheric H<sub>2</sub> to supplement mixotrophic growth**

236 To gain a better understanding of the mediators and roles of marine H<sub>2</sub> oxidation, we  
237 investigated H<sub>2</sub> uptake by three marine isolates encoding uptake hydrogenases. Two  
238 strains, *Robiginitalea biformata* DSM-15991 (Flavobacteriaceae)<sup>59</sup> and *Marinovum*  
239 *algiticola* FF3 (Rhodobacteraceae)<sup>60</sup>, did not substantially consume H<sub>2</sub> over a three-  
240 week period across a range of conditions despite encoding group 1I [NiFe]-  
241 hydrogenases. It is unclear if hydrogenases have become non-functional in these fast-  
242 growing laboratory-adapted isolates or if they are instead only active under very  
243 specific conditions. *Sphingopyxis alaskensis* RB2256 (Spingomonadaceae)<sup>61,62</sup>,  
244 which encodes a plasmid-borne group 2a [NiFe]-hydrogenase, aerobically consumed  
245 H<sub>2</sub> in a first-order kinetic process to sub-atmospheric levels (**Fig. 4**). Abundant in  
246 oligotrophic polar waters, *S. alaskensis* requires minimal resources to replicate given  
247 it forms extremely small cells (<0.1 μm<sup>3</sup>) and has a streamlined genome<sup>62–65</sup>.  
248 Previously thought to be an obligate organoheterotroph<sup>66</sup>, the discovery that this  
249 oligotrophic ultramicrobacterium<sup>67</sup> uses an abundant reduced gas as an energy

250 source further rationalises its ecological success. This is the first report of atmospheric  
251 H<sub>2</sub> oxidation by a marine bacterium.

252

253 We then determined whether *S. alaskensis* uses H<sub>2</sub> oxidation primarily to support  
254 mixotrophic growth or survival. Expression levels of its hydrogenase large subunit  
255 gene (*hucL*) were quantified by qRT-PCR. Under ambient conditions, this gene was  
256 expressed at significantly higher levels ( $p = 0.006$ ) during aerobic growth on organic  
257 carbon sources (mid-exponential phase; av.  $2.9 \times 10^7$  copies per g<sub>dw</sub>) than during  
258 survival (four days in stationary phase; av.  $1.5 \times 10^6$  copies per g<sub>dw</sub>;  $p = 0.006$ ) (**Fig.**  
259 **4a & 4b**). This expression pattern is similar to other organisms possessing a group 2a  
260 [NiFe]-hydrogenase<sup>12</sup> and is antithetical to that of the groups 1h and 1l [NiFe]-  
261 hydrogenases that are typically induced by starvation<sup>7,14,16,68</sup>. The activity of the  
262 hydrogenase was monitored under the same two conditions by monitoring depletion  
263 of headspace H<sub>2</sub> mixing ratios over time by gas chromatography. H<sub>2</sub> was rapidly  
264 oxidised by exponentially growing cultures to sub-atmospheric concentrations within  
265 a period of 30 hours, whereas negligible consumption was observed for stationary  
266 phase cultures (**Fig. 4c**). Together, these findings suggest that *S. alaskensis* can grow  
267 mixotrophically in marine waters by simultaneously consuming dissolved H<sub>2</sub> with  
268 available organic substrates. These findings align closely with that observed for other  
269 organisms harbouring group 2a [NiFe]-hydrogenases<sup>12,13</sup> and supports the inferences  
270 from thermodynamic modelling (**Fig. 3**) that H<sub>2</sub> likely supports growth of some marine  
271 bacteria.

272

273 **Genes for trace gas oxidation are globally distributed and increase in relative**  
274 **abundance with ocean depth**

275 We gained a global perspective on the distribution of the genes for H<sub>2</sub> and CO  
276 oxidation by searching the metagenomes of the TARA Oceans dataset. Similarly to  
277 our metagenomes, H<sub>2</sub>-uptake hydrogenases (predominantly from groups 1d, 1l, and  
278 2a) were quite rare in surface waters (encoded by 1.2% bacteria and archaea) and  
279 form I CO dehydrogenases were common (encoded by 15%). These genes were  
280 observed in samples spanning all four oceans, as well as the Red Sea and  
281 Mediterranean Sea (**Fig. 5**). Importantly, we also observed that these genes increased  
282 in relative abundance by approximately fourfold in metagenomes from mesopelagic  
283 (200 to 1000 m deep) compared to surface waters ( $p < 0.0001$ ). This pattern was  
284 consistent across sites in the Atlantic, Indian, Pacific, and Southern Oceans. These  
285 findings justify future studies comparing the rates and power associated with H<sub>2</sub> and  
286 CO oxidation in deep compared to surface waters.

287

288

## 289 **Conclusions**

290 Through an integrative approach, we provide the first demonstration that H<sub>2</sub> is an  
291 important energy source for seawater communities. The biogeochemical,  
292 metagenomic, and thermodynamic modelling analyses together suggest that H<sub>2</sub> is  
293 oxidised by a small proportion of community members, but at sufficiently fast cell-  
294 specific rates to enable mixotrophic growth. These findings are supported by  
295 experimental observations that the ultramicrobacterium *Sphingopyxis alaskensis*  
296 consumes H<sub>2</sub> during heterotrophic growth. Marine bacteria likely gain a major  
297 competitive advantage from being able to consume this abundant, diffusible, high-  
298 energy gas. H<sub>2</sub>-oxidising marine microorganisms are globally distributed, though the  
299 activity-based measurements suggest complex controls on their activity and suggest

300 they may be particularly active in low-chlorophyll waters. In contrast, our findings  
301 support that CO oxidation is a widespread trait that enhances the flexibility of habitat  
302 generalists <sup>39,40</sup>, especially in high-chlorophyll waters. At the biogeochemical scale,  
303 our findings indicate marine bacteria mitigate atmospheric H<sub>2</sub> emissions <sup>28</sup> and  
304 potentially account for undersaturation of H<sub>2</sub> in Antarctic waters <sup>37</sup>.

305

306 Yet a major enigma remains. H<sub>2</sub> and CO are among the most dependable energy  
307 sources in the sea given their relatively high concentrations and energy yields. So why  
308 do relatively few bacteria harness them? By comparison, soils are net sinks for these  
309 trace gases given the numerous bacteria present rapidly consume them <sup>21</sup>. We  
310 propose the straightforward explanation that the resource investment required to make  
311 the metalloenzymes to harness these trace gases may not always be justified by the  
312 energy gained. In the acutely iron-limited ocean, hydrogenases (containing 12-13 Fe  
313 atoms per protomer <sup>20</sup>) and to a lesser extent CO dehydrogenases (containing four Fe  
314 atoms per protomer <sup>69</sup>) are a major investment. This trade-off is likely to be most  
315 pronounced in the surface ocean, where solar energy that can be harvested using  
316 minimal resources through energy-converting rhodopsins. However, the iron  
317 investment required to consume H<sub>2</sub> and CO is likely to be justified in energy-limited  
318 waters where primary production is low. This is consistent with the observed  
319 enrichment of hydrogenases and CO dehydrogenases in metagenomes from  
320 mesopelagic waters, as well as increased H<sub>2</sub> oxidation observed in subantarctic  
321 waters. Thus, oceans continue to be a net source of H<sub>2</sub> and CO despite the importance  
322 of these energy sources for diverse marine bacteria.

323

## Materials and Methods

### Sample collection and characteristics

To determine the ability of marine microbial communities to oxidise trace gases, a total of 14 marine surface water samples were collected from three different locations (**Fig. S1**). Eight samples were collected from across the Munida Microbial Observatory Time-Series transect (Otago, New Zealand) <sup>70</sup> on 23/07/2019, in calm weather, on the *RV Polaris II*. This marine transect begins off the coast of Otago, New Zealand and extends through neritic, subtropical, and subantarctic waters <sup>70</sup>. Eight equidistant stations were sampled travelling east, ranging from approximately 15 km to 70 km from Taiaroa Head. At each station, water was collected at 1 m depth using Niskin bottles and stored in two 1 L autoclaved bottles. One bottle was reserved for DNA filtration and extraction, whereas the other was used for microcosm incubation experiments. The vessel measured changes in salinity and temperature to determine the boundaries of each water mass (**Fig. S2**).

Four samples were also collected from the temperate Port Phillip Bay at Carrum Beach (Victoria, Australia) on 20/03/2019 and two were collected from the tropical Heron Island (Queensland, Australia) on 9/7/2019. At both sites, near-shore surface microlayer (SML) and surface water samples were collected in the subtidal zone (water depth ca. 1 m). At Port Phillip Bay, two samples were also collected at 7.5 km and 15 km east of the mouth of the Patterson River, labelled 'Intermediate' and 'Centre' respectively. In all cases, surface water samples of 3 L were collected with a sterile Schott bottle from approximately 20 cm depth and aliquoted for microcosm incubation and DNA extraction. SML samples were collected using a manual glass-plate sampler of 1800 cm<sup>2</sup> surface area <sup>71</sup>. A total of 520 – 580 mL was collected in 150 – 155 dips,

resulting in an average sampling thickness of 20  $\mu\text{m}$ . For the SML samples, 180 mL was reserved for microcosm incubations with the remaining volume used for DNA extraction. From all transects, each sample reserved for DNA extraction was vacuum-filtered using 0.22  $\mu\text{m}$  polycarbonate filters, which were stored until extraction at  $-80^{\circ}\text{C}$ .

### **Measurement of dissolved $\text{H}_2$ and CO**

Dissolved gases were also sampled *in situ* at each transect to measure dissolved concentrations of CO and  $\text{H}_2$ . Serum vials (160 mL) were filled with seawater using a gas-tight tube, allowing approximately 300 mL to overflow. The vial was then sealed with a treated lab-grade butyl rubber stopper, avoiding the introduction of gas to the vial. An ultra-pure  $\text{N}_2$  headspace (20 mL) was introduced to the vial by concurrently removing 20 mL of liquid, using two gas-tight syringes. The vials were then shaken vigorously for 2 minutes before equilibration for 5 minutes to allow dissolved gases to enter the headspace. 17 mL of the headspace was then collected into a syringe flushed with  $\text{N}_2$  by returning the removed liquid to the vial, and 2 mL was purged to flush the stopcock and needle before injecting the remaining 15 mL into a  $\text{N}_2$ -flushed and evacuated silicone-closed Exetainer<sup>72</sup> for storage. Exetainers were sealed with a stainless-steel bolt and O-ring and stored until measurement.  $\text{H}_2$  and CO concentrations in the Exetainers were analysed by gas chromatography using a pulse discharge helium ionisation detector (model TGA-6792-W-4U-2, Valco Instruments Company Inc.), as previously described<sup>16</sup>, calibrated against standard CO and  $\text{H}_2$  gas mixtures of known concentrations.

### ***Ex situ* activity assays**

To determine the ability of these marine microbial communities to oxidise CO and H<sub>2</sub>, the seawater samples were incubated with these gases under laboratory conditions and their concentration over time was measured with gas chromatography. For each sample, triplicate microcosms were setup in which seawater was transferred into foil-insulated serum vials (60 mL seawater in 120 mL vials for Munida transect and Port Phillip Bay; 80 mL seawater in 160 mL vials for Heron Island) and sealed with treated lab-grade butyl rubber stoppers <sup>72</sup>. For each sampling location, one set of triplicates was also autoclaved and used as a control. The ambient air headspace of each vial was spiked with H<sub>2</sub> and CO so that they reached initial headspace mixing ratios of either 2 ppmv (Munida transect and Port Phillip Bay) or 10 ppmv (Heron Island). Microcosms were continuously agitated at 20°C on a shaker table at 100 rpm. For Munida and Port Phillip Bay samples, 1 mL samples were extracted daily from the headspace and their content was measured by gas chromatography as described above. For Heron Island samples, at each timepoint, 6 mL gas was extracted and stored in 12 mL UHP-He-flushed conventional Exetainers (2018) or pre-evacuated 3 mL silicone-sealed Exetainers <sup>72</sup>.

### **Calculation of dissolved gas concentrations**

The dissolved concentrations of gases in seawater at equilibrium state and at 1 atmospheric pressure were calculated according to the Sechenov relation for mixed electrolyte solutions as described by Weisenberger & Schumpe (1996) <sup>73</sup>:

$$\log\left(\frac{k_{G,o}}{k_G}\right) = \sum(h_i + h_G)c_i \quad (\text{EQ.1})$$



where  $k_{G,0}$  and  $k_G$  denote the gas solubility (or Henry's law constant in equivalent) in water and the mixed electrolyte solution, respectively,  $h_i$  is a constant specific to the dissolved ion  $i$  ( $\text{m}^3 \text{ kmol}^{-1}$ ),  $h_G$  is a gas-specific parameter ( $\text{m}^3 \text{ kmol}^{-1}$ ), and  $c_i$  represents the concentration of the dissolved ion  $i$  in solution ( $\text{kmol m}^{-3}$ ). The gas-specific constant,  $h_G$ , at temperature  $T$  (in K) follows the equation:

$$h_G = h_{G,0} + h_T(T - 298.15) \quad (\text{EQ.2})$$

where  $h_{G,0}$  represents the value of  $h_G$  at 298.15 K and  $h_T$  is a gas-specific parameter for the temperature effect ( $\text{m}^3 \text{ kmol}^{-1} \text{ K}^{-1}$ ). The gas solubility parameter  $k_{G,0}$  at temperature  $T$  follows combined Henry's law and van' t Hoff equation:

$$k_{G,0} = k'_{G,0} \cdot e^{\frac{-\Delta_{soln}H}{R}(\frac{1}{T} - \frac{1}{298.15})} \quad (\text{EQ.3})$$

where  $k'_{G,0}$  denotes Henry's law constant of the gas at 298.15 K,  $\Delta_{soln}H$  is the enthalpy of solution and  $R$  is the ideal gas law constant.

The dissolved concentrations of gases at equilibrium with the headspace gas phase, at 1 atmospheric pressure and incubation temperature 20°C were calculated based on a mean seawater composition reported in Dickson and Goyet (1994) <sup>74</sup>. The salinity correcting constants  $h_i$ ,  $h_{G,0}$ ,  $h_T$  were adopted from Weisenberger & Schumpe (1996) <sup>73</sup> while the temperature correcting constants  $k'_{G,0}$  and  $\frac{-\Delta_{soln}H}{R}$  were obtained from Sander (2015) <sup>75</sup>.

## Kinetic analysis and thermodynamic modelling

For kinetic analysis, measurement time points up to 30 days of incubation time were used. The gas consumption pattern was fitted with both an exponential model and a linear model. The former showed a lowest overall Akaike information criterion value for both H<sub>2</sub> and CO consumption (**Table S1**). As such, first order reaction rate constants were calculated and used for the kinetic modelling. In addition, only samples having at least two replicates with a positive rate constant were deemed to have a confident gas consumption. Bulk atmospheric gas oxidation rates for each sample were calculated with respect to the mean atmospheric mixing ratio of the corresponding trace gases (H<sub>2</sub>: 0.53 ppmv; CO: 0.09 ppmv; CH<sub>4</sub>: 1.9 ppmv). To estimate the cell-specific gas oxidation rate, the average direct cell count values reported for surface seawaters at Port Phillip Bay centre <sup>76</sup> and the eight stations along the Munida transect were used <sup>70,76</sup>. Assuming all cells are viable and active, cell-specific gas oxidation rates were then inferred by dividing cell counts and the proportion of corresponding gas oxidisers from the metagenomic analysis.

To estimate the energetic contributions of H<sub>2</sub> and CO oxidation to the corresponding marine trace gas oxidisers, we performed thermodynamics modelling to calculate their respective theoretical energy yields according to the first order kinetics of each sample estimated above. Power (Gibbs energy per unit time per cell),  $P$  follows the equation:

$$P = \frac{v \cdot \Delta G_r}{B} \quad (\text{EQ. 4})$$

where  $v$  denotes the rate of substrate consumption per L of seawater (mol L<sup>-1</sup> s<sup>-1</sup>) and  $B$  is the number of microbial cells (cells L<sup>-1</sup>) performing the reactions H<sub>2</sub> + 0.5 O<sub>2</sub> → H<sub>2</sub>O (dihydrogen oxidation) and CO + 0.5 O<sub>2</sub> → CO<sub>2</sub> (carbon monoxide oxidation).  $\Delta G_r$

represents the Gibbs free energy of the reaction at the experimental conditions (J mol<sup>-1</sup>) and follows the equation:

$$\Delta G_r = \Delta G_r^0 + RT \ln Q_r \quad (\text{EQ. 5})$$

where  $\Delta G_r^0$  denotes the standard Gibbs free energy of the reaction,  $Q_r$  denotes the reaction quotient,  $R$  represents the ideal gas constant, and  $T$  represents temperature in Kelvin. Values of  $\Delta G_r^0$  of the hydrogen oxidation and carbon monoxide oxidation were obtained from Thauer et al. (1977) <sup>77</sup>. Values of  $Q_r$  for each reaction were calculated using:

$$Q_r = \prod a_g^{n_i} \quad (\text{EQ. 6})$$

where  $a_i$  and  $n_i$  denote the dissolved concentration of the  $i^{\text{th}}$  species in seawater and the stoichiometric coefficient of the  $i^{\text{th}}$  species in the reaction of interest, respectively. Gibbs free energy for oxidation of hydrogen and carbon monoxide at atmospheric pressure and incubation temperature 20°C was calculated.

### **Metagenomic sequencing and analysis**

DNA was extracted from the sample filters using the DNeasy PowerSoil kit (QIAGEN) as per manufacturer's instructions. Sample libraries, including an extraction blank control, were prepared with the Nextera XT DNA Sample Preparation Kit (Illumina) and sequenced on an Illumina NextSeq500 platform (2 × 151 bp) at the Australian Centre for Ecogenomics (University of Queensland). An average of 20,122,526 read pairs were generated per sample, with 827,868 read pairs sequenced in the negative

control (**Table S2**). Raw metagenomic data was quality controlled with the BBTools suite v38.90 (<https://sourceforge.net/projects/bbmap/>), using BBDuk to remove the 151<sup>st</sup> base, trim adapters, filter PhiX reads, trim the 3' end at a quality threshold of 15 and discard reads below 50 bp in length. Reads detected in the extraction blank were additionally removed with BMap v38.90, leaving a total of 97.7% of raw sample reads for further analysis. High quality short reads were then profiled for taxonomy by assembling and classifying 16S rRNA and 18S rRNA genes with PhyloFlash v3.4 <sup>78</sup>. Short reads were assembled individually with metaSPAdes v3.14.1 <sup>79</sup> and collectively (all samples together, and by location) with MEGAHIT v1.2.9 <sup>80</sup>. Coverage profiles for each contig were generated by mapping the short reads to the assemblies with BMap v38.90 <sup>81</sup>.

Genome binning was performed with MetaBAT2 v2.15.5 <sup>82</sup>, MaxBin 2 v2.2.7 <sup>83</sup> and CONCOCT v1.1.0 <sup>84</sup> setting each tool to retain only contigs  $\geq 2000$  bp in length. For each assembly, resulting bins were dereplicated across binning tools with DAS\_Tool v1.1.3 <sup>85</sup>. All bins were refined with RefineM v0.1.2 <sup>86</sup> and consolidated into a final set of non-redundant metagenome-assembled-genomes (MAGs) at the default 99% average nucleotide identity using dRep v3.2.2 <sup>87</sup>. The completeness, contamination and strain heterogeneity of each MAG was calculated with CheckM v1.1.3 <sup>88</sup>, resulting in a total of 21 high-quality ( $> 90\%$  completeness,  $< 5\%$  contamination <sup>89</sup>) and 89 medium-quality ( $> 50\%$  completeness,  $< 10\%$  contamination <sup>89</sup>) MAGs. Taxonomy was assigned to each MAG with GTDB-Tk v1.6.0 <sup>90</sup> (using GTDB release 202) <sup>91</sup> and open reading frames were predicted from each MAG and additionally across all contigs (binned and unbinned) with Prodigal v2.6.3 <sup>92</sup>. CoverM v0.6.1 (<https://github.com/wwood/CoverM>) “genome” was used to calculate the relative

abundance of each MAG in each sample (--min-read-aligned-percent 0.75, --min-read-percent-identity 0.95, --min-covered-fraction 0) and the mean read coverage per MAG across the dataset (-m mean, --min-covered-fraction 0).

High quality short reads and predicted proteins from assemblies MAGs underwent metabolic annotation using DIAMOND v2.0.9 (--max-target-seqs 1, --max-hsps 1) <sup>93</sup> for alignment against a custom set of 50 metabolic marker protein databases. The marker proteins (<https://doi.org/10.26180/c.5230745>) cover the major pathways for aerobic and anaerobic respiration, energy conservation from organic and inorganic compounds, carbon fixation, nitrogen fixation, and phototrophy <sup>7</sup>. Gene hits were filtered as follows: alignments were filtered to retain only those at least 40 amino acids in length (short read alignments) or with at least 80% query or 80% subject coverage (predicted MAG proteins). Alignments were further filtered by a minimum percentage identity score by gene: for short reads, this was 80% (PsaA), 75% (HbsT), 70% (PsbA, IsoA, AtpA, YgfK and ARO), 60% (CoxL, MmoA, AmoA, NxrA, RbcL, NuoF, FeFe hydrogenases and NiFe Group 4 hydrogenases), or 50% (all other genes). For predicted proteins, the same thresholds were used except for AtpA (60%), PsbA (60%), RdhA (45%), Cyc2 (35%) and RHO (30%). For short reads, gene abundance in the community was estimated as *average gene copies per organism* by dividing the abundance of the gene (in reads per kilobase million, RPKM) by the mean abundance of 14 universal single-copy ribosomal marker genes (in RPKM, obtained from the SingleM v0.13.2 package, <https://github.com/wwood/singlem>). For single-copy metabolic genes, this corresponds to the proportion of community members that encode the gene. A linear correlation analysis, performed in GraphPad Prism 9, was

used to determine how metagenomic gene abundance correlated with *ex situ* H<sub>2</sub> and CO oxidation rates.

### **Culture-based growth and gas consumption analysis**

Axenic cultures of three bacterial strains were analysed in this study: *Sphingopyxis alaskensis* (RB2256)<sup>61,62</sup> obtained from UNSW Sydney, *Robiginitalea biformata* DSM-15991<sup>59</sup> imported from DSMZ, and *Marinovum algicola* FF3 (Rhodobacteraceae)<sup>60</sup> imported from DSMZ. Cultures were maintained in 120 mL glass serum vials containing a headspace of ambient air (H<sub>2</sub> mixing ratio ~0.5 ppmv) sealed with treated lab-grade butyl rubber stoppers<sup>72</sup>. Broth cultures of all three species were grown in 30 mL of Difco 2216 Marine Broth media and incubated at 30°C at an agitation speed of 150 rpm in a Ratek Orbital Mixer Incubator with access to natural day/night cycles. Growth was monitored by determining the optical density (OD<sub>600</sub>) of periodically sampled 1 mL extracts using an Eppendorf BioSpectrophotometer. The ability of the three cultures to oxidise H<sub>2</sub> was measured with gas chromatography. Cultures in biological triplicate were opened, equilibrated with ambient air (1 h), and resealed. These re-aerated vials were then amended with H<sub>2</sub> (via 1% v/v H<sub>2</sub> in N<sub>2</sub> gas cylinder, 99.999% pure) to achieve final headspace concentrations of ~10 ppmv. Headspace mixing ratios were measured immediately after closure and at regular intervals thereafter until the limit of quantification of the gas chromatograph was reached (42 ppbv H<sub>2</sub>). This analysis was performed for both exponential (OD<sub>600</sub> 0.67 for *S. alaskensis*) and stationary phase cultures (~72 h post OD<sub>max</sub> for *S. alaskensis*).

### **Quantitative RT-PCR analysis**

Quantitative reverse transcription PCR (qRT-PCR) was used to determine the expression levels of the group 2a [NiFe]-hydrogenase large subunit gene (*hucL*; locus Sala\_3198) in *S. alaskensis* during growth and survival. For RNA extraction, triplicate 30 mL cultures of *S. alaskensis* were grown synchronously in 120 mL sealed serum vials. Cultures were grown to either exponential phase (OD<sub>600</sub> 0.67) or stationary phase (48 h post OD<sub>max</sub> ~3.2). Cells were then quenched using a glycerol-saline solution (-20°C, 3:2 v/v), harvested by centrifugation (20,000 x *g*, 30 min, -9°C), resuspended in 1 mL cold 1:1 glycerol:saline solution (-20°C), and further centrifuged (20,000 x *g*, 30 min, -9°C). Briefly, resultant cell pellets were resuspended in 1 mL TRIzol Reagent (Thermo Fisher Scientific), mixed with 0.1 mm zircon beads (0.3 g), and subject to beat-beating (three 30 s on / 30 s off cycles, 5000 rpm) in a Precellys 24 homogenizer (Bertin Technologies) prior to centrifugation (12,000 x *g*, 10 min, 4°C). Total RNA was extracted using the phenol-chloroform method as per manufacturer's instructions (TRIzol Reagent User Guide, Thermo Fisher Scientific) and resuspended in diethylpyrocarbonate-treated water. RNA was treated using the TURBO DNA-free kit (Thermo Fisher Scientific) as per manufacturer's instructions. RNA concentration and purity were confirmed using a NanoDrop ND-1000 spectrophotometer.

cDNA was synthesised using a SuperScript III First-Strand Synthesis System kit for qRT-PCR (Thermo Fisher Scientific) with random hexamer primers, as per manufacturer's instructions. Quantitative RT-PCR was performed using a LightCycler 480 SYBR Green I Master Mix (Roche) as per manufacturer's instructions in 96-well plates and conducted in a QuantStudio 7 Flex Real-Time PCR System (Applied Biosystems). Primers were designed using Primer3<sup>94</sup> to target the *hucL* gene (HucL\_fw: AGCTACACAAACCCTCGACA; HucL\_rvs: AGTCGATCATGAACAGGCCA)

and the 16S rRNA gene as a housekeeping gene (16S\_fwd: AACCTCATCCCTAGTTGCC; 16S\_rvs: GGTTAGAGCATTGCCTTCGG). Copy numbers for each gene were interpolated from standard curves of each gene created from threshold cycle ( $C_T$ ) values of amplicons that were serially diluted from  $10^8$  to 10 copies ( $R^2 > 0.98$ ). Hydrogenase expression data was then normalised to the housekeeping in exponential phase. All biological triplicate samples, standards, and negative controls were run in technical duplicate. A student's t-test in GraphPad Prism 9 was used to compare *hucL* expression levels between exponential and stationary phase.



## Footnotes

**Data availability statement:** All raw metagenomes and metagenome-assembled genomes are deposited to the NCBI Sequence Read Archive under the BioProject accession number PRJNA801081. Metagenomics analysis scripts are publicly available at <https://github.com/greeninglab/MarineOxidationManuscript>

**Acknowledgements:** This study was supported by ARC Discovery Project grants (DP180101762 and P210101595; both awarded to P.L.M.C. and C.G.), an ARC DECRA Fellowship (DE170100310; salary for C.G.), an NHMRC EL2 Fellowship (APP1178715; salary for C.G.), an Australian Government Research Training Stipend Scholarship (awarded to P.M.L.), Monash International Tuition Scholarships (awarded to P.M.L. and Y.J.C.), and Monash Postgraduate Publications Awards (awarded to Z.F.I. and Y.J.C.).

**Author contributions:** C.G. conceived and supervised this study. C.G., G.S., S.E.M., P.L.M.C., R.L., and Z.I. designed experiments. G.S., S.L., S.E.M., P.A.N., Y.J.C., A.J.K., and P.L.M.C. contributed to field work. R.L., G.S., S.L., and C.G. contributed to metagenome analysis. G.S., P.M.L., P.A.N., and C.G. contributed to biogeochemical analysis. P.M.L., C.G., F.B., and P.M.L.C. contributed to thermodynamic modelling. Z.F.I., T.J., G.S., T.J.W., R.C., and C.G. contributed to culture-based work. C.G., R.L., and Z.F.I. wrote the paper with input from all authors.

The authors declare no conflict of interest.

## References

1. Greening, C. & Grinter, R. Microbial oxidation of atmospheric trace gases. *Nat. Rev. Microbiol.* In press (2022).
2. Piché-Choquette, S. & Constant, P. Molecular hydrogen, a neglected key driver of soil biogeochemical processes. *Appl. Environ. Microbiol.* **85**, e02418-18 (2019).
3. Greening, C., Islam, Z. F. & Bay, S. K. Hydrogen is a major lifeline for aerobic bacteria. *Trends Microbiol.* doi:10.1016/j.tim.2021.08.004 (2021).
4. Berney, M. & Cook, G. M. Unique flexibility in energy metabolism allows mycobacteria to combat starvation and hypoxia. *PLoS One* **5**, e8614 (2010).
5. Greening, C., Berney, M., Hards, K., Cook, G. M. & Conrad, R. A soil actinobacterium scavenges atmospheric H<sub>2</sub> using two membrane-associated, oxygen-dependent [NiFe] hydrogenases. *Proc. Natl. Acad. Sci. U. S. A.* **111**, 4257–4261 (2014).
6. Myers, M. R. & King, G. M. Isolation and characterization of *Acidobacterium ailaoui* sp. nov., a novel member of Acidobacteria subdivision 1, from a geothermally heated Hawaiian microbial mat. *Int. J. Syst. Evol. Microbiol.* **66**, 5328–5335 (2016).
7. Ortiz, M. *et al.* Multiple energy sources and metabolic strategies sustain microbial diversity in Antarctic desert soils. *Proc. Natl. Acad. Sci. USA* In revision (2021).
8. King, G. M. Molecular and culture-based analyses of aerobic carbon monoxide oxidizer diversity. *Appl. Environ. Microbiol.* **69**, 7257–7265 (2003).
9. Cordero, P. R. F. *et al.* Atmospheric carbon monoxide oxidation is a widespread mechanism supporting microbial survival. *ISME J.* **13**, 2868–2881 (2019).
10. Greening, C., Villas-Bôas, S. G., Robson, J. R., Berney, M. & Cook, G. M. The growth and survival of *Mycobacterium smegmatis* is enhanced by co-metabolism of atmospheric H<sub>2</sub>. *PLoS One* **9**, e103034 (2014).
11. Liot, Q. & Constant, P. Breathing air to save energy – new insights into the ecophysiological role of high-affinity [NiFe]-hydrogenase in *Streptomyces avermitilis*. *Microbiologyopen* **5**, 47–59 (2016).
12. Islam, Z. F. *et al.* A widely distributed hydrogenase oxidises atmospheric H<sub>2</sub> during bacterial growth. *ISME J.* **14**, 2649–2658 (2020).
13. Leung, P. M. *et al.* A nitrite-oxidising bacterium constitutively oxidises atmospheric H<sub>2</sub>. *bioRxiv* (2021).
14. Constant, P., Chowdhury, S. P., Pratscher, J. & Conrad, R. Streptomycetes contributing to atmospheric molecular hydrogen soil uptake are widespread and encode a putative high-affinity [NiFe]-hydrogenase. *Environ. Microbiol.* **12**, 821–829 (2010).

15. Greening, C. *et al.* Persistence of the dominant soil phylum Acidobacteria by trace gas scavenging. *Proc. Natl. Acad. Sci. U. S. A.* **112**, 10497–10502 (2015).
16. Islam, Z. F. *et al.* Two Chloroflexi classes independently evolved the ability to persist on atmospheric hydrogen and carbon monoxide. *ISME J.* **13**, 1801–1813 (2019).
17. Schmitz, R. A. *et al.* The thermoacidophilic methanotroph *Methylacidiphilum fumariolicum* SolV oxidizes subatmospheric H<sub>2</sub> with a high-affinity, membrane-associated [NiFe] hydrogenase. *ISME J.* **14**, 1223–1232 (2020).
18. Hardy, K. R. & King, G. M. Enrichment of high-affinity CO oxidizers in Maine forest soil. *Appl. Environ. Microbiol.* **67**, 3671–3676 (2001).
19. King, C. E. & King, G. M. Description of *Thermogemmatispora carboxidivorans* sp. nov., a carbon-monoxide-oxidizing member of the class Ktedonobacteria isolated from a geothermally heated biofilm, and analysis of carbon monoxide oxidation by members of the class Ktedonobacter. *Int. J. Syst. Evol. Microbiol.* **64**, 1244–1251 (2014).
20. Greening, C. *et al.* Genomic and metagenomic surveys of hydrogenase distribution indicate H<sub>2</sub> is a widely utilised energy source for microbial growth and survival. *ISME J.* **10**, 761–777 (2016).
21. Bay, S. K. *et al.* Trace gas oxidizers are widespread and active members of soil microbial communities. *Nat. Microbiol.* **6**, 246–256 (2021).
22. Xu, Y. *et al.* Genome-resolved metagenomics reveals how soil bacterial communities respond to elevated H<sub>2</sub> availability. *Soil Biol. Biochem.* **163**, 108464 (2021).
23. Schmidt, U. Molecular hydrogen in the atmosphere. *Tellus* **26**, 78–90 (1974).
24. Walter, S. *et al.* Isotopic evidence for biogenic molecular hydrogen production in the Atlantic Ocean. *Biogeosciences* **13**, 323–340 (2016).
25. Moore, R. M. *et al.* Extensive hydrogen supersaturations in the western South Atlantic Ocean suggest substantial underestimation of nitrogen fixation. *J. Geophys. Res. Ocean.* **119**, 4340–4350 (2014).
26. Conte, L., Szopa, S., Séférian, R. & Bopp, L. The oceanic cycle of carbon monoxide and its emissions to the atmosphere. *Biogeosciences* **16**, 881–902 (2019).
27. Khalil, M. A. K. & Rasmussen, R. A. The global cycle of carbon monoxide: Trends and mass balance. *Chemosphere* **20**, 227–242 (1990).
28. Ehhalt, D. H. & Rohrer, F. The tropospheric cycle of H<sub>2</sub>: a critical review. *Tellus, Ser. B Chem. Phys. Meteorol.* **61**, 500–535 (2009).
29. Miller, W. L. & Zepp, R. G. Photochemical production of dissolved inorganic carbon from terrestrial organic matter: Significance to the oceanic organic carbon cycle. *Geophys. Res. Lett.* **22**, 417–420 (1995).
30. Moore, R. M., Punshon, S., Mahaffey, C. & Karl, D. The relationship between

- dissolved hydrogen and nitrogen fixation in ocean waters. *Deep Sea Res. Part I Oceanogr. Res. Pap.* **56**, 1449–1458 (2009).
31. Kessler, A. J. *et al.* Bacterial fermentation and respiration processes are uncoupled in permeable sediments. *Nat. Microbiol.* **4**, 1014–1023 (2019).
  32. Swinnerton, J. W., Linnenbom, V. J. & Lamontagne, R. A. The ocean: a natural source of carbon monoxide. *Science* **167**, 984–986 (1970).
  33. Swinnerton, J. W. & Lamontagne, R. A. Carbon monoxide in the South Pacific Ocean. *Tellus* **26**, 136–142 (1974).
  34. Herr, F. L., Scranton, M. I. & Barger, W. R. Dissolved hydrogen in the Norwegian Sea: Mesoscale surface variability and deep-water distribution. *Deep Sea Res. Part A. Oceanogr. Res. Pap.* **28**, 1001–1016 (1981).
  35. Herr, F. L. Dissolved hydrogen in Eurasian Arctic waters. *Tellus B* **36**, 55–66 (1984).
  36. Conrad, R., Seiler, W., Bunse, G. & Giehl, H. Carbon monoxide in seawater (Atlantic Ocean). *J. Geophys. Res. Ocean.* **87**, 8839–8852 (1982).
  37. Conrad, R. & Seiler, W. Methane and hydrogen in seawater (Atlantic Ocean). *Deep Sea Res. Part A. Oceanogr. Res. Pap.* **35**, 1903–1917 (1988).
  38. Conrad, R. & Seiler, W. Photooxidative production and microbial consumption of carbon monoxide in seawater. *FEMS Microbiol. Lett.* **9**, 61–64 (1980).
  39. Tolli, J. D., Sievert, S. M. & Taylor, C. D. Unexpected diversity of bacteria capable of carbon monoxide oxidation in a coastal marine environment, and contribution of the *Roseobacter*-associated clade to total CO oxidation. *Appl. Environ. Microbiol.* **72**, 1966–1973 (2006).
  40. Mou, X., Sun, S., Edwards, R. A., Hodson, R. E. & Moran, M. A. Bacterial carbon processing by generalist species in the coastal ocean. *Nature* **451**, 708–711 (2008).
  41. Cunliffe, M. Correlating carbon monoxide oxidation with *cox* genes in the abundant marine *Roseobacter* clade. *ISME J.* **5**, 685 (2011).
  42. Royo-Llonch, M. *et al.* Compendium of 530 metagenome-assembled bacterial and archaeal genomes from the polar Arctic Ocean. *Nat. Microbiol.* (2021) doi:10.1038/s41564-021-00979-9.
  43. Cunliffe, M. Physiological and metabolic effects of carbon monoxide oxidation in the model marine bacterioplankton *Ruegeria pomeroyi* DSS-3. *Appl. Environ. Microbiol.* **79**, 738–740 (2013).
  44. Christie-Oleza, J. A., Fernandez, B., Nogales, B., Bosch, R. & Armengaud, J. Proteomic insights into the lifestyle of an environmentally relevant marine bacterium. *ISME J.* **6**, 124 (2012).
  45. Muthusamy, S. *et al.* Comparative proteomics reveals signature metabolisms of exponentially growing and stationary phase marine bacteria. *Environ. Microbiol.* **19**, 2301–2319 (2017).
  46. Giebel, H.-A., Wolterink, M., Brinkhoff, T. & Simon, M. Complementary energy

- acquisition via aerobic anoxygenic photosynthesis and carbon monoxide oxidation by *Planktomarina temperata* of the *Roseobacter* group. *FEMS Microbiol. Ecol.* **95**, fiz050 (2019).
47. Schwartz, E., Fritsch, J. & Friedrich, B. *H<sub>2</sub>-metabolizing prokaryotes*. (Springer Berlin Heidelberg, 2013).
  48. Adam, N. & Perner, M. Microbially mediated hydrogen cycling in deep-sea hydrothermal vents. *Front. Microbiol.* **9**, 2873 (2018).
  49. Anantharaman, K., Breier, J. A., Sheik, C. S. & Dick, G. J. Evidence for hydrogen oxidation and metabolic plasticity in widespread deep-sea sulfur-oxidizing bacteria. *Proc. Natl. Acad. Sci.* **110**, 330–335 (2013).
  50. Barz, M. *et al.* Distribution analysis of hydrogenases in surface waters of marine and freshwater environments. *PLoS One* **5**, e13846 (2010).
  51. Eichner, M. J., Basu, S., Gledhill, M., de Beer, D. & Shaked, Y. Hydrogen dynamics in *Trichodesmium* colonies and their potential role in mineral iron acquisition. *Front. Microbiol.* **10**, 1565 (2019).
  52. Bothe, H., Schmitz, O., Yates, M. G. & Newton, W. E. Nitrogen fixation and hydrogen metabolism in cyanobacteria. *Microbiol. Mol. Biol. Rev.* **74**, 529–551 (2010).
  53. Nauer, P. A. *et al.* Pulses of labile carbon cause transient decoupling of fermentation and respiration in permeable sediments. *bioRxiv* In preparation (2022).
  54. Sunagawa, S. *et al.* Structure and function of the global ocean microbiome. *Science* **348**, 1261359 (2015).
  55. Chen, Y. J. *et al.* Metabolic flexibility allows bacterial habitat generalists to become dominant in a frequently disturbed ecosystem. *ISME J.* 10.1038/s41396-021-00988-w (2021) doi:10.1101/2020.02.12.945220.
  56. DeLong, J. P., Okie, J. G., Moses, M. E., Sibly, R. M. & Brown, J. H. Shifts in metabolic scaling, production, and efficiency across major evolutionary transitions of life. *Proc. Natl. Acad. Sci.* **107**, 12941–12945 (2010).
  57. LaRowe, D. E. & Amend, J. P. Power limits for microbial life. *Front. Microbiol.* **6**, 718 (2015).
  58. Lever, M. A. *et al.* Life under extreme energy limitation: A synthesis of laboratory- and field-based investigations. *FEMS Microbiology Reviews* vol. 39 688–728 (2015).
  59. Cho, J.-C. & Giovannoni, S. J. *Robiginitalea biformata* gen. nov., sp. nov., a novel marine bacterium in the family Flavobacteriaceae with a higher G+ C content. *Int. J. Syst. Evol. Microbiol.* **54**, 1101–1106 (2004).
  60. Lafay, B. *et al.* *Roseobacter algicola* sp. nov., a new marine bacterium isolated from the phycosphere of the toxin-producing dinoflagellate *Prorocentrum lima*. *Int. J. Syst. Evol. Microbiol.* **45**, 290–296 (1995).
  61. Schut, F. *et al.* Isolation of typical marine bacteria by dilution culture: growth,



- maintenance, and characteristics of isolates under laboratory conditions. *Appl. Environ. Microbiol.* **59**, 2150–2160 (1993).
62. Schut, F., Gottschal, J. C. & Prins, R. A. Isolation and characterisation of the marine ultramicrobacterium *Sphingomonas* sp. strain RB2256. *FEMS Microbiol. Rev.* **20**, 363–369 (1997).
  63. Vancanneyt, M. *et al.* *Sphingomonas alaskensis* sp. nov., a dominant bacterium from a marine oligotrophic environment. *Int. J. Syst. Evol. Microbiol.* **51**, 73–79 (2001).
  64. Eguchi, M. *et al.* *Sphingomonas alaskensis* strain AFO1, an abundant oligotrophic ultramicrobacterium from the North Pacific. *Appl. Environ. Microbiol.* **67**, 4945–4954 (2001).
  65. Cavicchioli, R., Ostrowski, M., Fegatella, F., Goodchild, A. & Guixa-Boixereu, N. Life under nutrient limitation in oligotrophic marine environments: an eco/physiological perspective of *Sphingopyxis alaskensis* (formerly *Sphingomonas alaskensis*). *Microb. Ecol.* **45**, 203–217 (2003).
  66. Williams, T. J., Ertan, H., Ting, L. & Cavicchioli, R. Carbon and nitrogen substrate utilization in the marine bacterium *Sphingopyxis alaskensis* strain RB2256. *ISME J.* **3**, 1036–1052 (2009).
  67. Lauro, F. M. *et al.* The genomic basis of trophic strategy in marine bacteria. *Proc. Natl. Acad. Sci.* **106**, 15527–15533 (2009).
  68. Berney, M., Greening, C., Hards, K., Collins, D. & Cook, G. M. Three different [NiFe] hydrogenases confer metabolic flexibility in the obligate aerobe *Mycobacterium smegmatis*. *Environ. Microbiol.* **16**, 318–330 (2014).
  69. Dobbek, H., Gremer, L., Meyer, O. & Huber, R. Crystal structure and mechanism of CO dehydrogenase, a molybdo iron-sulfur flavoprotein containing S-selanyl cysteine. *Proc. Natl. Acad. Sci. U. S. A.* **96**, 8884–8889 (1999).
  70. Baltar, F., Stuck, E., Morales, S. & Currie, K. Bacterioplankton carbon cycling along the subtropical frontal zone off New Zealand. *Prog. Oceanogr.* **135**, 168–175 (2015).
  71. Cunliffe, M. & Wurl, O. *Guide to best practices to study the ocean's surface.* Marine Biological Association of the United Kingdom for SCOR Plymouth, UK (Marine Biological Association of the United Kingdom for SCOR, 2014).
  72. Nauer, P. A., Chiri, E., Jirapanjawan, T., Greening, C. & Cook, P. L. M. Technical note: Inexpensive modification of Exetainers for the reliable storage of trace-level hydrogen and carbon monoxide gas samples. *Biogeosciences* **18**, (2021).
  73. Weisenberger, S. & Schumpe, dan A. Estimation of gas solubilities in salt solutions at temperatures from 273 K to 363 K. *AIChE J.* **42**, 298–300 (1996).
  74. Dickson, A. G. & Goyet, C. *Handbook of methods for the analysis of the various parameters of the carbon dioxide system in sea water;* (Oak Ridge National Laboratory, 1994).

75. Sander, R. Compilation of Henry's law constants (version 4.0) for water as solvent. *Atmos. Chem. Phys.* **15**, 4399–4981 (2015).
76. Wenley, J. *et al.* Seasonal prokaryotic community linkages between surface and deep ocean water. *Front. Mar. Sci.* **8**, 777 (2021).
77. Thauer, R. K., Jungermann, K. & Decker, K. Energy conservation in chemotrophic anaerobic bacteria. *Bacteriol. Rev.* **41**, 100–180 (1977).
78. Gruber-Vodicka, H. R., Seah, B. K. B. & Pruesse, E. PhyloFlash: rapid small-subunit rRNA profiling and targeted assembly from metagenomes. *mSystems* **5**, e00920-20 (2019).
79. Nurk, S., Meleshko, D., Korobeynikov, A. & Pevzner, P. A. metaSPAdes: a new versatile metagenomic assembler. *Genome Res.* **27**, 824–834 (2017).
80. Li, D. H. *et al.* MEGAHIT v1.0: A fast and scalable metagenome assembler driven by advanced methodologies and community practices. *Methods* **102**, 3–11 (2016).
81. Bushnell, B. BMap: A Fast, Accurate, Splice-Aware Aligner. (2015).
82. Kang, D. *et al.* MetaBAT 2: an adaptive binning algorithm for robust and efficient genome reconstruction from metagenome assemblies. *PeerJ* **7**, e7359 (2019).
83. Wu, Y.-W., Simmons, B. A. & Singer, S. W. MaxBin 2.0: an automated binning algorithm to recover genomes from multiple metagenomic datasets. *Bioinformatics* **32**, 605–607 (2015).
84. Alneberg, J. *et al.* Binning metagenomic contigs by coverage and composition. *Nat. Methods* **11**, 1144 (2014).
85. Sieber, C. M. K. *et al.* Recovery of genomes from metagenomes via a dereplication, aggregation and scoring strategy. *Nat. Microbiol.* **1** (2018).
86. Parks, D. H. *et al.* Recovery of nearly 8,000 metagenome-assembled genomes substantially expands the tree of life. *Nat. Microbiol.* **2**, 1533 (2017).
87. Olm, M. R., Brown, C. T., Brooks, B. & Banfield, J. F. dRep: a tool for fast and accurate genomic comparisons that enables improved genome recovery from metagenomes through de-replication. *ISME J.* **11**, 2864 (2017).
88. Parks, D. H., Imelfort, M., Skennerton, C. T., Hugenholtz, P. & Tyson, G. W. CheckM: assessing the quality of microbial genomes recovered from isolates, single cells, and metagenomes. *Genome Res.* **25**, 1043–1055 (2015).
89. Bowers, R. M. *et al.* Minimum information about a single amplified genome (MISAG) and a metagenome-assembled genome (MIMAG) of bacteria and archaea. *Nat. Biotechnol.* **35**, 725–731 (2017).
90. Chaumeil, P.-A., Mussig, A. J., Hugenholtz, P. & Parks, D. H. GTDB-Tk: a toolkit to classify genomes with the Genome Taxonomy Database. *Bioinformatics* **36**, 1925–1927 (2020).
91. Parks, D. H. *et al.* A standardized bacterial taxonomy based on genome phylogeny substantially revises the tree of life. *Nat. Biotechnol.* **36**, 996–1004

(2018).

92. Hyatt, D. *et al.* Prodigal: prokaryotic gene recognition and translation initiation site identification. *BMC Bioinformatics* **11**, 119 (2010).
93. Buchfink, B., Xie, C. & Huson, D. H. Fast and sensitive protein alignment using DIAMOND. *Nat. Methods* **12**, 59 (2014).
94. Untergasser, A. *et al.* Primer3—new capabilities and interfaces. *Nucleic Acids Res.* **40**, e115–e115 (2012).



## Figures

**Figure 1. *Ex situ* oxidation of CO and H<sub>2</sub> by seawater communities.** Results are shown for **(a)** four samples in a transect of Port Phillip Bay, Victoria, Australia and **(b)** eight samples in the Munida transect off the coast of Otago, New Zealand. Each 120 mL sealed serum vial contained 60 mL of native seawater samples incubated in a 60 mL ambient air headspace supplemented with ~2.5 ppmv H<sub>2</sub> or CO. At each timepoint, the mixing ratio of each gas in the headspace of each vial was measured on a gas chromatograph and converted to dissolved gas concentrations (nM).

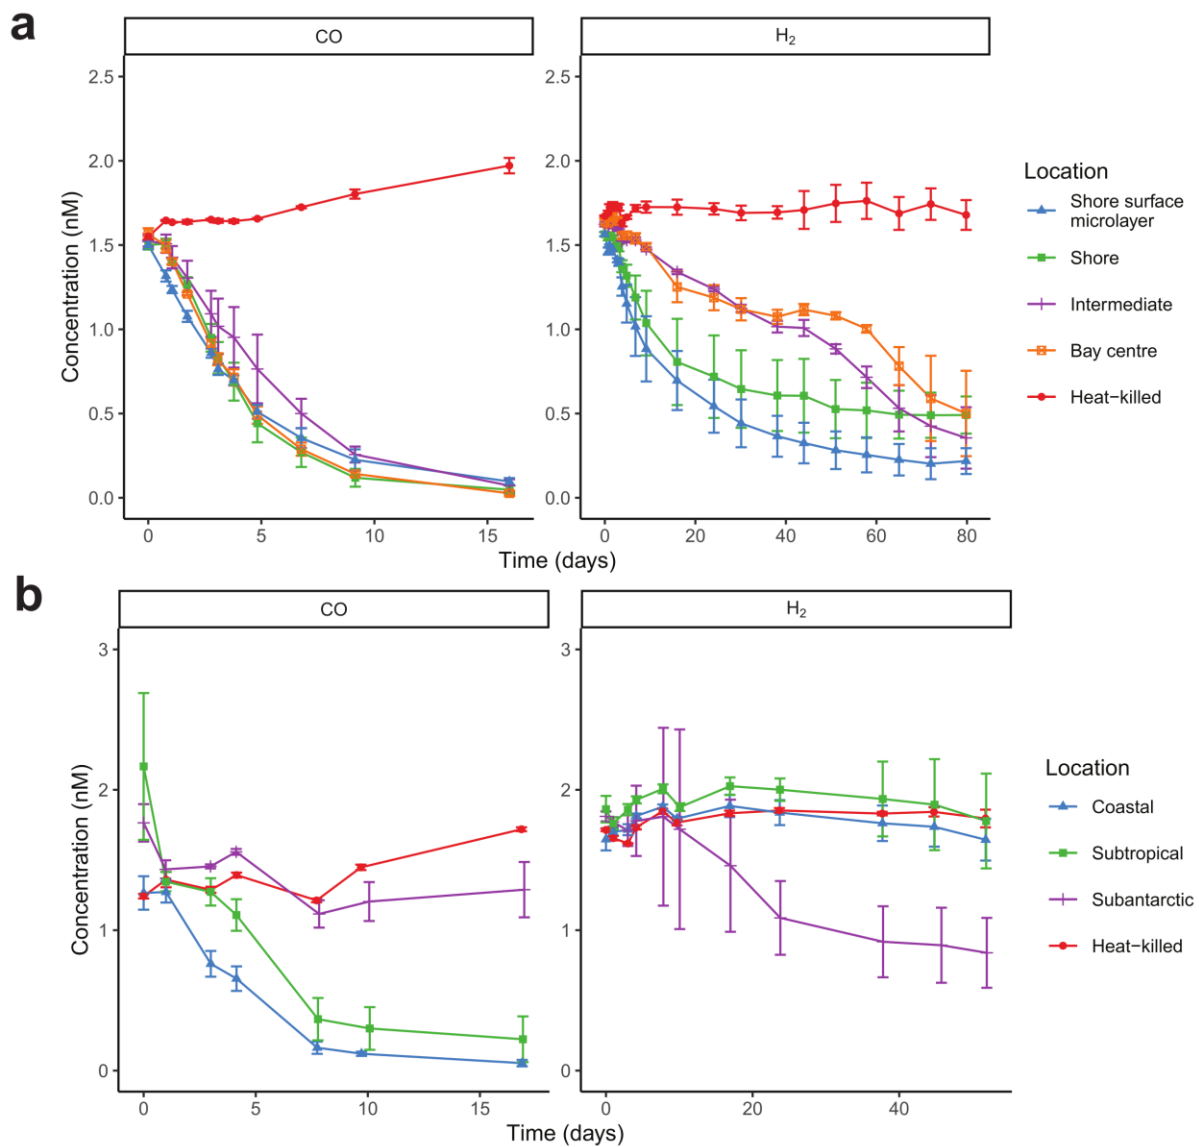

**Figure 2. Abundance and distribution of metabolic genes encoded by marine communities.** **(a)** Heatmap showing the abundance of metabolic marker genes in the metagenomic short reads across the three sampling locations and 14 samples. A homology-based search was used to calculate the relative abundance of marker genes as average gene copies per organism (abundance relative to a set of universal single-copy marker genes), and is equivalent to the estimated proportion of the community encoding a given gene as a single copy. Where multiple marker genes are listed, values are summed. The bottom panel shows the hydrogenase subgroups present in each sample. **(b)** Bubble plot showing metabolic potential of the 110 metagenome-assembled genomes (MAGs). MAGs are summarised at order level, with the size of the circle corresponding to the number of genomes in that order with a given gene, and the colour reflecting the percentage of genome completeness. Marker genes are omitted that were not detected in any MAG.

**a Metabolic pathway Abundance in community**

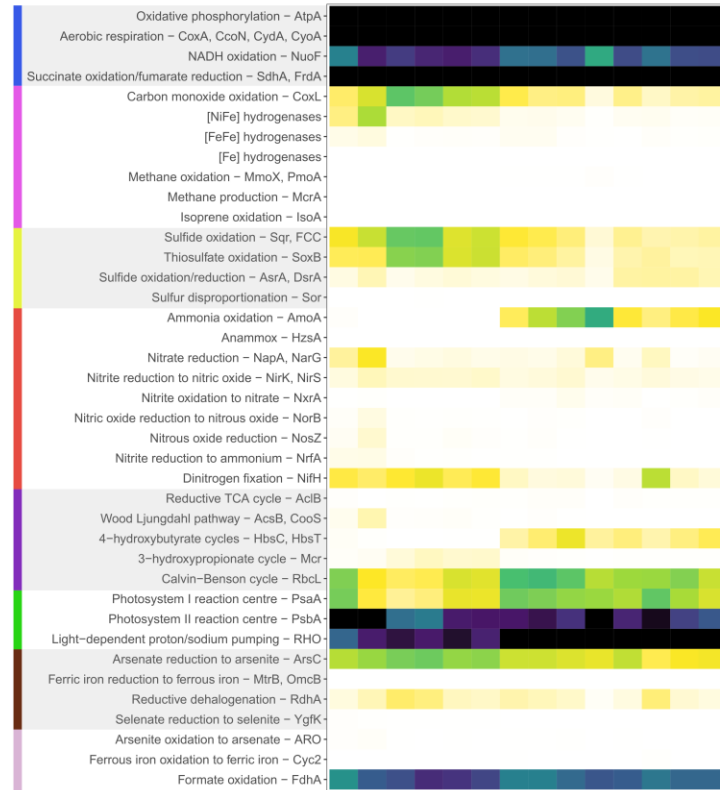

**Average gene copies per organism**

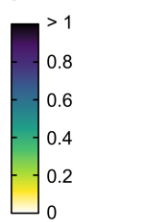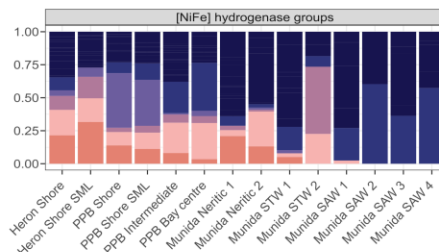

**b Metagenome-assembled genomes (Order level)**

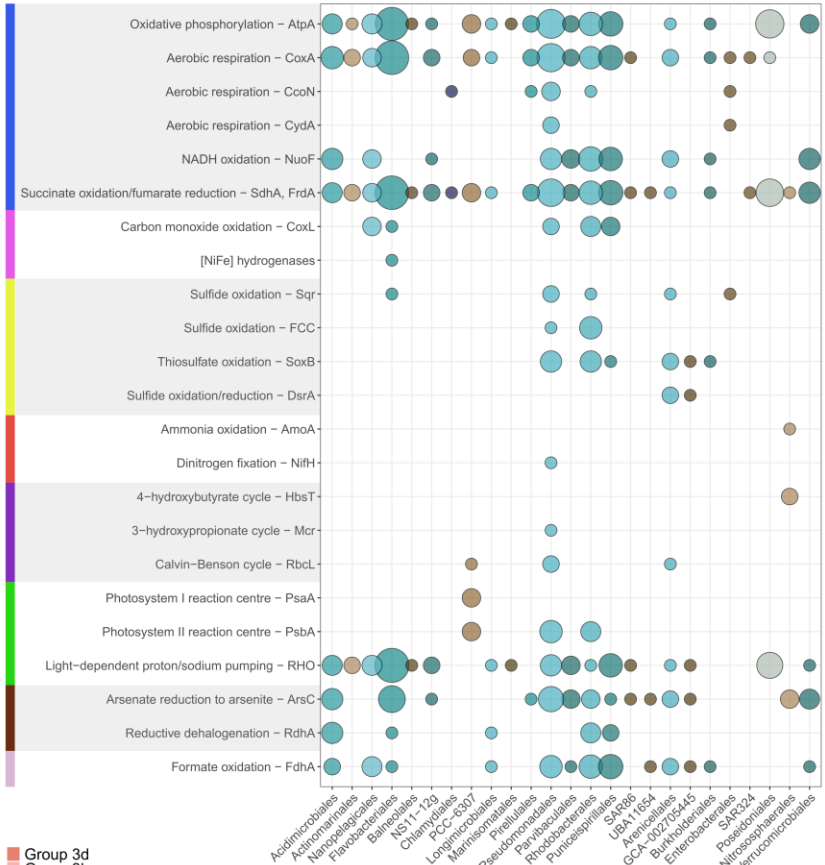

**Average genome completion**

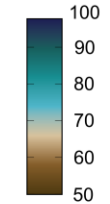

**Number of genomes**

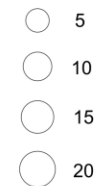

- Group 3d
- Group 3b
- Group 1d
- Group 2a
- Group 1l
- Other NiFe hydrogenases

- Aerobic respiration
- Trace gas metabolism
- Sulfur cycle
- Nitrogen cycle
- Carbon fixation
- Phototrophy
- Alternative electron acceptors
- Alternative electron donors

### Figure 3. Thermodynamic modelling of H<sub>2</sub> and CO oxidation by marine bacteria.

The results show the bulk oxidation rates (left), oxidation rates per cell (middle), and power yields per cell (right) for **(a)** CO oxidation and **(b)** H<sub>2</sub> oxidation. This analysis was only performed for samples where trace gas oxidation was measurable and cell-specific power was only calculated for samples where prokaryotic cell counts are available. Rates and power are shown based on CO and H<sub>2</sub> concentrations at a range of environmentally relevant concentrations.

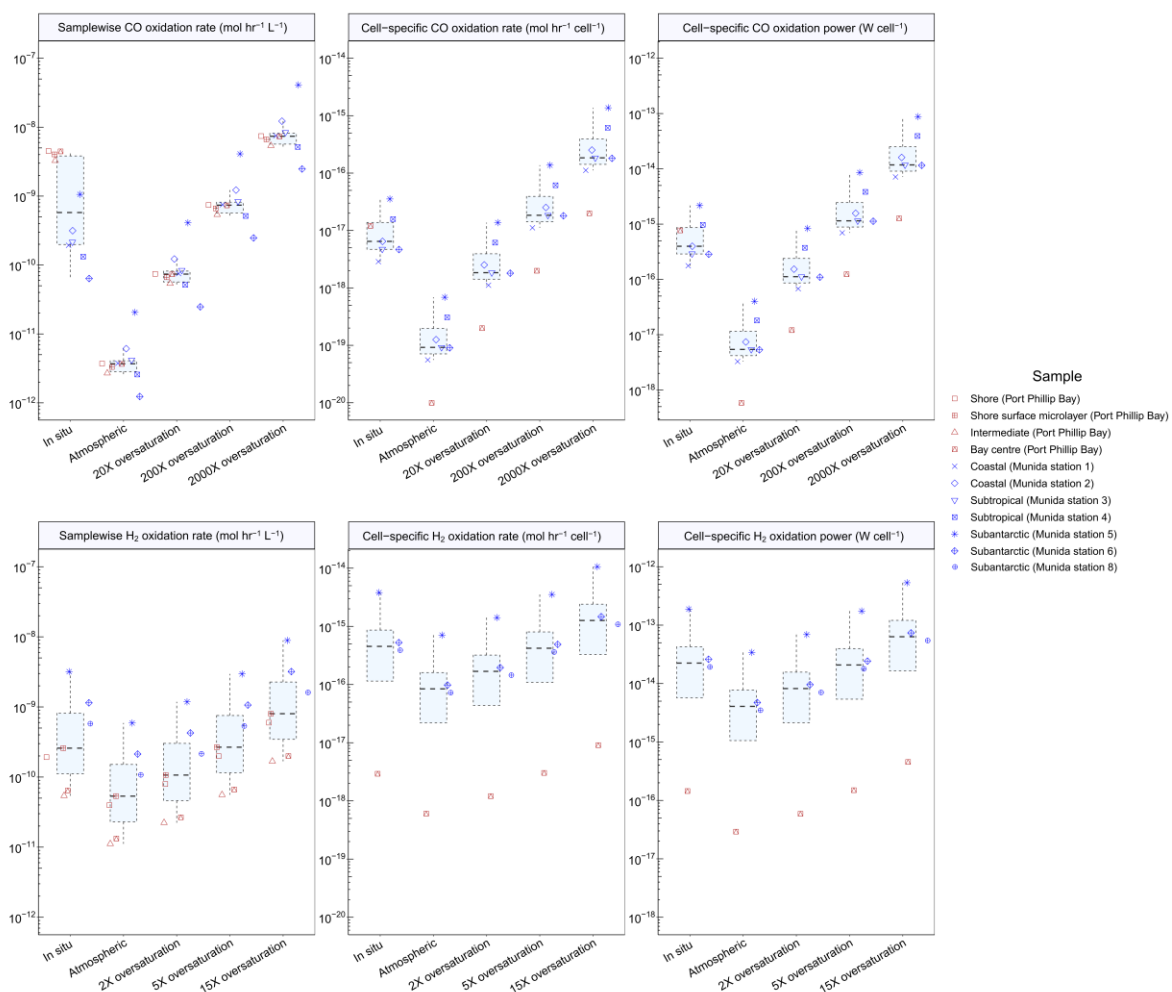

**Figure 4. Hydrogenase expression and activity of *Sphingopyxis alaskensis*. (a)**

Growth curve of *S. alaskensis* grown on Difco 2216 Marine Broth. Cultures were tested for gas consumption and harvested for qPCR in exponential phase (17 h, OD<sub>600</sub> = 0.66) and stationary phase (168 h, four days post-OD<sub>max</sub>). **(b)** Number of transcripts of the group 2a [NiFe]-hydrogenase large subunit gene (*hucL*; locus Sala\_3198), as measured by qRT-PCR, in exponential and stationary phase cultures of *S. alaskensis*. Error bars show standard deviations of three biological replicates (averaged from two technical duplicates) per condition. Values denoted by asterisks are statistically significant based on an unpaired t-test ( $p < 0.01$ ). **(c)** H<sub>2</sub> oxidation by exponential and stationary phase cultures of *Sphingopyxis alaskensis*. Error bars show the standard deviations of three biological replicates, with media-only vials monitored as negative controls. Dotted lines show the atmospheric concentration of hydrogen (0.53 ppmv).

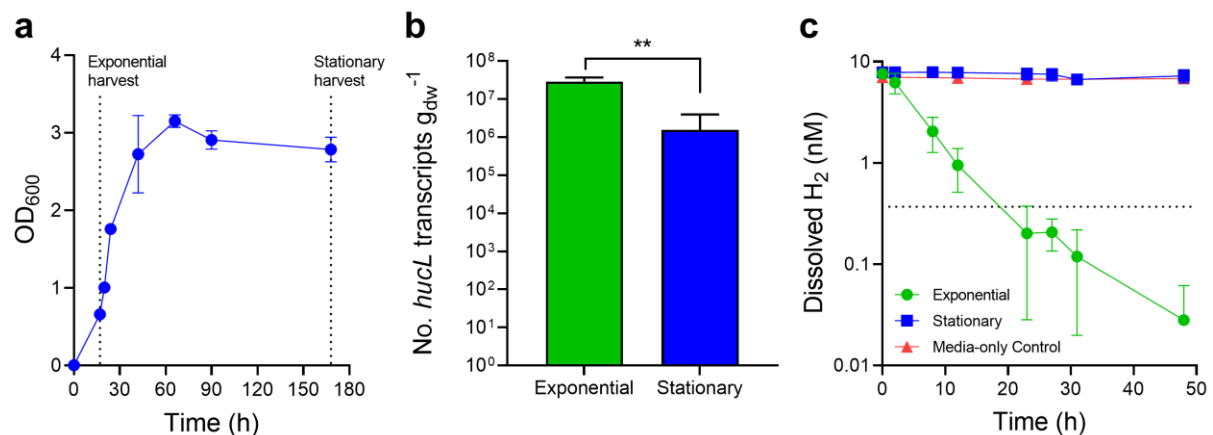

### Figure 5. Relative abundance of CO and H<sub>2</sub> oxidation genes in TARA Oceans metagenomes.

The relative abundance of the catalytic subunit genes of the carbon monoxide dehydrogenase (CoxL) and group 1 & 2 [NiFe]-hydrogenases (inc. HucL and HylL) was normalised to a set of single-copy genes and averaged across all samples at a location. Locations are sorted by oceanic region (NE = Northeast, NW = Northwest, SE = Southeast, SW = Southwest, Med. = Mediterranean). No mesopelagic samples were sequenced for the Mediterranean Sea or Red Sea.

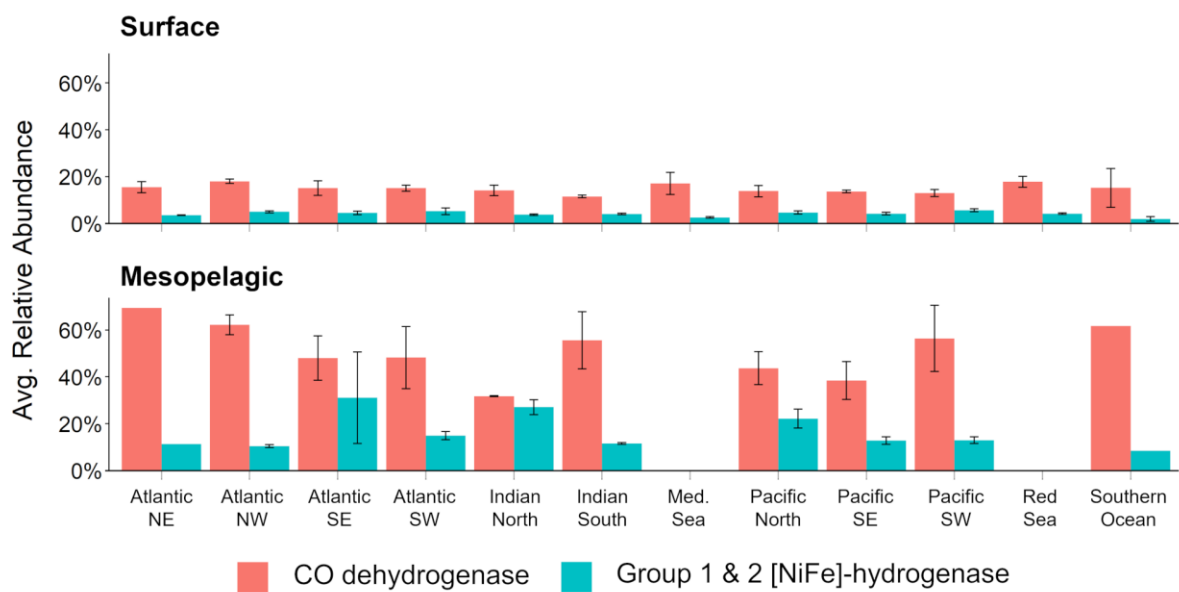

Source: https://www.biorxiv.org/content/10.1101/2022.01.29.478295v1.full.pdf
